# Supplementary material for: Androgens, Bilateral Oophorectomy, and Cardiovascular Disease Mortality in Postmenopausal Women With and Without Diabetes: The Study of Osteoporotic Fractures
Source: Oxford University Press journal article supplement (doi:10.2337/dc15-1434), 2015-10-12
Supplement: dc151434supplementarydata.pdf [file dc151434supplementarydata.pdf]

## SUPPLEMENTARY DATA

Investigators in the Study of Osteoporotic Fractures Research Group: San Francisco Coordinating Center (California Pacific Medical Center Research Institute and University of California San Francisco): SR Cummings (principal investigator), DC Bauer (co-investigator), DM Black (co-investigator), W Browner (co-investigator), PM Cawthon (co-investigator), N Lane (co-investigator), MC Nevitt (co-investigator), C McCulloch (co-investigator), A Schwartz (co-investigator), KL Stone (co-investigator), G Tranah (co-investigator), K Yaffe (co-investigator), R Benard, T Blackwell, L Concepcion, D Evans, S Ewing, C Fox, R Fullman, SL Harrison, M Jaime-Chavez, D Kriesel, W Liu, L Lui, L Palermo, N Parimi, K Peters, M Rahorst, C Schambach, J Ziarno.

University of Maryland: MC Hochberg (principal investigator), R Nichols (clinic coordinator), S Link.

University of Minnesota: KE Ensrud (principal investigator), S Diem (co-investigator), M Homan (co-investigator), P Van Coevering (program coordinator), S Fillhouer (clinic director), N Nelson (clinic coordinator), K Moen (assistant program coordinator), K Jacobson, M Forseth, R Andrews, S Luthi, Atchison, L Penland-Miller.

University of Pittsburgh: JA Cauley (principal investigator), LH Kuller (co-principal investigator), JM Zmuda (co-investigator), L Harper (project director), L Buck (clinic coordinator), M Danielson (project administrator), D Cusick, A Flaugh, M Gorecki, C Newman.

The Kaiser Permanente Center for Health Research, Portland, Oregon: T Hillier (principal investigator), K Vesco (co-investigator), K Pedula (co-investigator), J Van Marter (project director), M Summer (clinic coordinator), A MacFarlane, J Rizzo, K Snider, J Wallace.

# SUPPLEMENTARY DATA

**Supplementary Table S1.** Cardiovascular disease mortality according to diabetes and bilateral oophorectomy status and age at menopause accounting for the competing risk of other non-CVD causes, The Study of Osteoporotic Fractures

| Variables                | Events | Age Adjusted     | Multivariable adjusted* |
|--------------------------|--------|------------------|-------------------------|
|                          |        | HR (95%CI)       | HR (95%CI)              |
| No diabetes or BSO       | 1209   | 1 (Referent)     | 1 (Referent)            |
| Diabetes; no BSO         | 132    | 1.87 (1.55-2.25) | 1.94 (1.59-2.35)        |
| BSO; no diabetes         | 261    | 1.04 (0.91-1.18) | 1.02 (0.87-1.20)        |
| Diabetes and BSO         | 35     | 2.22 (1.56-3.16) | 2.52 (1.73-3.67)        |
| P <sub>interaction</sub> |        |                  | 0.218                   |
| Age at menopause         |        |                  |                         |
| Diabetes                 |        |                  |                         |
| NO BSO ≤ 45y             | 44     | 1 (Referent)     | 1 (Referent)            |
| BSO ≤ 45y                | 17     | 1.57 (0.93-2.66) | 2.66 (1.25-5.68)        |
| NO BSO > 45y             | 88     | 1 (Referent)     | 1 (Referent)            |
| BSO > 45y                | 18     | 1.20 (0.72-1.99) | 0.95 (0.49-1.83)        |
| Non Diabetes             |        |                  |                         |
| NO BSO ≤ 45y             | 389    | 1 (Referent)     | 1 (Referent)            |
| BSO ≤ 45y                | 102    | 1.12 (0.90-1.39) | 1.05 (0.81-1.35)        |
| NO BSO > 45y             | 820    | 1 (Referent)     | 1 (Referent)            |
| BSO > 45y                | 159    | 1.10 (0.93-1.30) | 0.96 (0.77-1.20)        |

\* Adjusted for age, education, age at menopause, hysterectomy, parity, postmenopausal hormone use, BMI, waist hip ratio, hypertension, smoking status and physical activity. BSO: bilateral oophorectomy
